# Recurrent excitation between motoneurones propagates across segments and is purely glutamatergic

G.S. Bhumbra and M. Beato

Department of Neuroscience, Physiology and Pharmacology,  
UCL, Gower Street, London WC1E 6BT, UK

**Corresponding author:** Marco Beato [m.beato@ucl.ac.uk](mailto:m.beato@ucl.ac.uk), Department of Neuroscience, Physiology and Pharmacology, UCL, Gower Street London WC1E 6BT, UK

**Acknowledgments:** This work was supported by grants from the Leverhulme Trust (grant number RPG-2013-176) and the Biotechnology and Biological Sciences Research Council (BBSRC, grant number BB/L001454) to MB. We are grateful to Professor John Wood for providing the GCaMP6s mice and to Professor Rob Brownstone for helpful discussions during the course of this study.

## Abstract

Spinal motoneurons constitute the final output for the execution of motor tasks. In addition to innervating muscles, motoneurons project excitatory collateral connections to Renshaw cells and other motoneurons, but the latter have received little attention. We show that motoneurons receive strong synaptic input from other motoneurons throughout development and into maturity with fast type motoneurons systematically receiving greater recurrent excitation than slow type motoneurons. Optical recordings show that activation of motoneurons in one spinal segment can propagate to adjacent segments even in the presence of intact recurrent inhibition. Quite remarkably, while it is known that transmission at the neuromuscular junction is purely cholinergic and Renshaw cells are excited through both acetylcholine and glutamate receptors, here we show that neurotransmission between motoneurons is purely glutamatergic indicating that motoneurons differentiate their transmission system depending on their post-synaptic target.

## 1 Introduction

2 Motoneurons (Mns) are the ultimate neural targets of effector commands issued from the  
3 central nervous system. Their activity is modulated by an intricate network of interneurons  
4 (Kiehn, 2016) that affect the distribution and timing of excitation to different motor pools (Mc-  
5 Crea and Rybak, 2008). Mns also receive direct inputs from supraspinal tracts and sensory  
6 afferents and their outputs are not confined to the peripheral muscles, but also include excita-  
7 tory collateral terminals to Renshaw cells (RCs).

8 Early anatomical studies in the cat have shown that Mn collaterals invade the motor nuclei  
9 region and form synaptic contacts with other Mns (Cullheim et al., 1977). Electrophysiological  
10 evidence of synaptic connectivity between Mns has been presented in the adult cat (Gogan  
11 et al., 1977), tadpole (Perrins and Roberts, 1995), neonatal (Ichinose and Miyata, 1998) and  
12 juvenile (Jiang et al., 1991) rat, and newborn mice (Nishimaru et al., 2005). However despite  
13 these initial reports, no study to date has reported systematically the extent, distribution, and  
14 pharmacology of direct synaptic connections between Mns.

15 Here we demonstrate strong recurrent excitation between Mns that is maintained throughout

1 development into maturity. Fast type Mns receive greater recurrent excitation than slow type  
2 Mns. Under normal physiological conditions recurrent excitation can override recurrent inhibi-  
3 tion and firing in one spinal segment propagates to neighbouring segments. Remarkably, while  
4 acetylcholine and a mixture of acetylcholine and glutamate act at the neuromuscular junction  
5 and RC synapses respectively (Mentis et al., 2005, Nishimaru et al., 2005), neurotransmission  
6 between Mns is purely glutamatergic.

## 7 **Results**

8 We performed paired recordings to measure the efficacy of unitary connections in fluores-  
9 cently labelled Mns innervating gastrocnemius. Simultaneous infrared and confocal imaging  
10 was used to identify and patch fluorescent Mns in a dorsal horn ablated spinal cord (Figure  
11 1A). Strychnine ( $0.5\ \mu\text{M}$ ) and gabazine ( $3\ \mu\text{M}$ ) were applied to block recurrent inhibition. Mns  
12 were patched in whole-cell voltage clamp while putative pre-synaptic cells were stimulated in  
13 loose-cell attached mode (see Methods) until an evoked response was detected in the post-  
14 synaptic cell. Figure 1B shows an example of a paired recording with an average evoked  
15 current of  $-34\ \text{pA}$ . A location map constructed from 14 out of the 18 recorded pairs (Figure  
16 1C) shows that connected Mns tended to be within  $150\ \mu\text{m}$  from one another, but with no  
17 systematic relationship between distance and size of response (range  $11\text{--}125\ \text{pA}$ ).

18 The rise and decay times of evoked currents (Figure 1D, response size colour coded) were  
19 fast, with a median rise time of  $0.59\ \text{s}$  and decay time of  $3.75\ \text{s}$ . There was however no correla-  
20 tion between either of the kinetic parameters and the size of response. In oblique slice prepa-  
21 rations (see Methods) we assessed the pharmacology of evoked responses (Figure 1E). The  
22 postsynaptic current was fully abolished by bath-application of  $50\ \mu\text{M}$  APV and  $2\ \mu\text{M}$  NBQX, to  
23 block AMPA and NMDA receptors respectively (Figure 1F, top). Identical results were obtained  
24 from all four pairs tested (Figure 1F, bottom).

25 Since the tested unitary connections might have represented a specific local subset from the  
26 entire population of Mn-Mn synapses, we investigated the pharmacology of currents evoked  
27 by ventral root (VR) stimulation, thus pooling responses of all inputs from a given segment

1 (Figure 2A). In the example of Figure 2A-C, we simultaneously recorded from a Renshaw cell  
2 (RC, Figure 2B, top, red) and a Mn (Figure 2B, bottom, blue). Whereas bath application of  
3 glutamate antagonists resulted in a reduction of the RC response to approximately 50%, the  
4 response in the Mn is completely abolished. The remaining cholinergic component of the  
5 response in the RC was blocked by further application of 10 nM MLA and 5  $\mu$ M DH $\beta$ E to block  
6  $\alpha$ 7 and  $\alpha$  $\beta$  receptors respectively (Figure 2C). Group data from all 16 Mn recordings showed  
7 complete suppression of the evoked currents following application of glutamate antagonists  
8 alone (Figure 2D).

9 While the data from Figure 2D were obtained from juvenile mice (P7-14), we performed sim-  
10 ilar recordings from more mature animals (P15-25) to determine whether pure glutamatergic  
11 transmission is preserved throughout development. Figure 2E-F shows that the response  
12 is fully suppressed by glutamatergic blockade. In 20 Mns recorded in voltage-clamp (black,  
13 Figure 2G), or in current-clamp (blue, to reduce the duration of the stimulus artefact), gluta-  
14 matergic antagonists entirely suppressed responses, whereas prior cholinergic blockade had  
15 no significant effect ( $n = 6$ , Wilcoxon's sign-rank  $z = -0.53$ ,  $P = 0.600$ ).

16 We next investigated whether recurrent excitation could propagate across segments in a coro-  
17 nal preparation in which Mns innervating gastrocnemius were labelled. Figure 3A illustrates  
18 recurrent excitatory post-synaptic currents (rEPSCs) recorded in L5 (left) and L4 (right) Mns  
19 while stimulating the L5 (upper, blue trace) or L4 (lower, red trace) ventral root (VR). The  
20 rEPSC size from 43 recordings from L4 and L5 Mns is plotted against the distance from L4/L5  
21 border, colour coded to represent responses evoked by L4 (red) or L5 (blue) VR stimulation  
22 (Figure 3B). There were no obvious differences in rEPSC size between the two stimulated  
23 roots or between L4 and L5 motoneurons. Comparison of rEPSCs from responses to VR  
24 stimulation from the same segment or neighbouring segment showed no significant differ-  
25 ences (Figure 3B right, Wilcoxon's rank-sum  $z = 0.612$ ,  $P = 0.541$ ).

26 We then assessed whether the magnitude of recurrent excitation was related to the intrinsic  
27 properties of post-synaptic Mns. Two types of Mns were identified according to their firing  
28 pattern at rheobase in current clamp recordings (Leroy et al., 2014). The first type (Figure 3C,  
29 left, purple) has high a rheobase and produces *delayed firing* with a pronounced increase in

1 firing rate during positive current application and is associated with fast-type units. By contrast  
2 the second type (Figure 3C, right, green) has a lower rheobase and *immediate firing* with  
3 little change in spike frequency, characteristic of slow-type units (Leroy et al., 2014). High  
4 rheobase (Figure 3D, left) and accelerating initial firing (Figure 3D, middle) were correlated  
5 with the size of rEPSCs, with median values of 1814 pA in the delayed firing cells and 267 pA  
6 in the immediate firing cells. Comparison between the two groups confirmed a significant  
7 difference (Figure 3D right, Wilcoxon's rank-sum  $z = 3.72$ ,  $P < 0.001$ ).

8 Differences between the two cell types are also associated with their passive properties,  
9 with delayed firing Mns showing lower resistances (median 22 M $\Omega$ ) and higher capacitances  
10 (median 237 pF) than their immediate firing counterparts (median resistance 44 M $\Omega$ , median  
11 capacitance 125 pF) both at statistical significant levels (Wilcoxon's rank-sum  $|z| \geq 2.94$ ,  
12  $P \leq 0.003$ ). Recurrent excitatory responses were recorded from delayed firing (Figure 3E,  
13 purple) and immediate firing (Figure 3E, green) cells in both voltage clamp (top) and cur-  
14 rent clamp (bottom). Pooling all cell types together, correlations were observed between the  
15 size of response and resistance or capacitance (Spearman's  $|r| \geq 0.516$ ,  $P < 0.001$ , Figure  
16 3F).

17 The presence of inhibition antagonists during electrophysiological recordings precluded eval-  
18 uation of whether recurrent excitation could override recurrent inhibition, We therefore con-  
19 ducted calcium imaging experiments in mice selectively expressing GCaMP6s in Mns to eval-  
20 uate the propagation of recurrent excitation across different segments with recurrent inhibition  
21 intact. Figure 4A-C illustrates a coronal preparation with a suction electrode applied to the L5  
22 ventral root (Figure 4A, left). Calcium signals were acquired throughout the dorsal motor col-  
23 umn of L4 and L5 (Figure 4A, middle) with 146 ms frame interval before, during, and following  
24 a train of three VR stimulations at 30 Hz. The signal from regions of interest, defined by the  
25 outline of Mn somata, was evaluated for the period of acquisition under control conditions, in  
26 the presence of 0.5  $\mu\text{M}$  strychnine and 3  $\mu\text{M}$  gabazine, and following application 50  $\mu\text{M}$  APV and  
27 2  $\mu\text{M}$  NBQX (Figure 4A, right).

28 In control, recurrent excitation evoked spikes in Mns from both L4 and L5 segments, as shown  
29 by running medians and inter-quartile ranges of the relative fluorescence signal (Figure 4B,

1 red) throughout both segments. Bath application of strychnine and gabazine resulted in sub-  
2 stantial amplification of responses throughout the motor column (Figure 4B, green) whereas  
3 additional application of glutamatergic antagonists abolished responses from the L4 segment  
4 and attenuated those from L5 Mns (Figure 4B, blue). The residual response in L5 Mns reflects  
5 antidromic activation. Scattergrams, colour-coded by regions, comparing control responses to  
6 those during application of inhibitory antagonists (Figure 4C, left) and additional glutamatergic  
7 blockade (Figure 4C, right) confirm that while responses were greater in the lumbar regions  
8 closer to the stimulated VR, the relative effects of block of recurrent inhibition, or excitation,  
9 were similar throughout L4 and L5.

10 Group data from 461 Mns from 7 preparations are shown in Figure 4D, comparing responses  
11 within and across segments for the three conditions. In control, responses were significantly  
12 greater within the stimulated segment compared to outside (Figure 4D, left, Wilcoxon's rank-  
13 sum  $z = 8.50$ ,  $P < 0.001$ ) and these difference were maintained after block of inhibition  
14 (Figure 4D, middle) and excitation (Figure 4D, right) ( $z \geq 7.23$ ,  $P < 0.001$ ). Pooling Mns  
15 from both segments, blockade of inhibition consistently increased the signal (Wilcoxon's sign-  
16 rank  $z = -18.59$ ,  $P < 0.001$ ) whereas a significant reduction in signal was observed following  
17 additional application of glutamatergic antagonists ( $z = 18.20$ ,  $P < 0.001$ ). Residual firing  
18 was mostly confined to Mns within the stimulated segment through antidromic activation, thus  
19 confirming the purely glutamatergic nature of recurrent excitation.

## 20 Discussion

21 Our experiments show that strong recurrent excitation between Mns is maintained throughout  
22 development and fast Mns receive greater recurrent excitation than slow ones, We demon-  
23 strate that synaptic transmission between motoneurons is purely glutamatergic. While it  
24 could be argued that the observed small unitary post-synaptic responses ( $\sim 100$  pA) would  
25 have little effect on the excitability of Mns whose somata are very large, ventral root stimula-  
26 tion evoked responses usually exceeding 1 nA indicating extensive convergence of segmental  
27 Mn populations.

1 The variation in the magnitude of rEPSCs is associated with Mn classification into delayed and  
2 immediate firing types. Larger responses were systematically observed in the delayed firing,  
3 low resistance, and high capacitance cells. Our results are thus consistent with a structural  
4 connectivity in which the fast-type larger Mns receive stronger recurrent excitation compared  
5 to slow-type smaller cells. This pattern of connectivity suggests that recurrent excitation could  
6 play a role in sequential recruitment of fast-type units during motor tasks in which progressively  
7 increasing muscular forces are needed. Alternatively, recurrent excitation might represent a  
8 closed-loop amplification circuit that reinforces and increases the firing rate preferentially in  
9 fast-type Mns and thus rapidly increase muscle contraction strength when required.

10 In neonatal animals VR stimulation can induce fictive locomotion (Mentis et al., 2005). These  
11 effects cannot be explained solely by recurrent excitation and may provide evidence for Mn  
12 collaterals contacting unidentified interneurons (Machacek and Hochman, 2006) connected  
13 to the central pattern generator for locomotion (Bonnot et al., 2009). The recurrent excitation  
14 characterised in the present study comprises predominantly a monosynaptic component evi-  
15 denced by the near constant latency of responses and extensive connectivity among Mn pairs.  
16 However, in the absence of recurrent inhibition, a disynaptic component was often observed,  
17 representing responses to orthodromic activation of groups of Mns not antidromically activated  
18 by VR stimulation. Such recruitment implies the existence of a positive-feedback amplifying  
19 circuit whose tendency to reverberate may be suppressed by recurrent inhibition.

20 A glutamate receptor-dependent effect on Mn EPSPs evoked by VR stimulation has been re-  
21 ported previously (Jiang et al., 1991) but it was attributed to afferent fibres within the root  
22 (Coggeshall, 1980), a possibility excluded by subsequent labelling studies (Mentis et al.,  
23 2005). A previous study has reported a purely cholinergic response to VR stimulation in a  
24 small proportion (2/9) of Mns (Nishimaru et al., 2005). Across all electrophysiological record-  
25 ings of the present study however, there was not a single instance of a cholinergic component.  
26 The origin of such a discrepancy may result from differences in maturity, since in the previous  
27 study (Nishimaru et al., 2005) neonatal mice (P0-P4) were used, while our experiments were  
28 performed on mice of weight bearing age (P7-P25).

29 Neurotransmission between Mns is purely glutamatergic, yet following normal maturation,

1 the neuromuscular junction is solely cholinergic (Borodinsky and Spitzer, 2007) and synap-  
2 tic transmission of recurrent collaterals onto Renshaw cells is mixed with both cholinergic and  
3 glutamatergic components (Lamotte d'Incamps et al., 2017). This remarkable dissociation  
4 demonstrates a differentiation of neurotransmission systems from Mns on the basis of their  
5 post-synaptic target. However, the presence of vesicular glutamate transporters in Mn collater-  
6 als is still controversial. Immunohistochemistry and *in situ* hybridization studies have reported  
7 the expression of the vesicular transporter VGlut2 in some Mns terminals onto RCs that are  
8 either positive (Nishimaru et al., 2005) or negative (Herzog et al., 2004) for the vesicular acetyl-  
9 choline transporter. These respective findings indicate either coexistence or segregation of  
10 cholinergic and glutamatergic transmission of Mns onto RCs.

11 Others however have not detected the presence of VGlut2, or any other vesicular glutamate  
12 transporter, in Mn terminals (Mentis et al., 2005, Liu et al., 2009). It is possible that such  
13 discrepancies arise from undetectable albeit functional expression levels of VGlut2. Another  
14 possibility is the existence of an unidentified vesicular glutamate transporter (Mentis et al.,  
15 2005, Liu et al., 2009). This hypothesis is supported by the presence of glutamate releasing  
16 C-fibres in the dorsal horn that are nevertheless negative for all known vesicular glutamate  
17 transporters (Todd et al., 2003, Alvarez et al., 2004). Since many Mn terminals may contain  
18 more aspartate than glutamate (Richards et al., 2014), it has been proposed that the released  
19 neurotransmitter could be aspartate. However, aspartate alone cannot activate AMPA recep-  
20 tors that mediate responses of RCs (Lamotte d'Incamps and Ascher, 2008) or of the Mns  
21 characterised in the present study. Glutamate thus remains the most likely candidate.

## 22 **Materials and Methods**

23 All experiments were carried out in accordance with the Animal (Scientific Procedures) Act  
24 (Home Office, UK, 1986) and were approved by the UCL Ethical Committee, under project  
25 licence number 70/7621. Experiments were performed on preparations obtained from male  
26 or female mice bred using a C57BL/6J background. For electrophysiological experiments with  
27 simultaneous recordings from motoneurons (Mns) and Renshaw cells (RCs) a transgenic



1 strain, in which the enhanced green fluorescent protein (EGFP) is expressed under the control  
2 of the promotor of the neuronal glycine transporter GlyT-2 (Zeilhofer et al., 2005), was used to  
3 label glycinergic interneurons.

#### 4 **Spinal cord preparations**

5 Following anaesthesia by intraperitoneal injection of a mixture of ketamine/xylazine (80 mg/kg  
6 and 10 mg/kg respectively), both juvenile and mature mice were decapitated and the spinal  
7 cord dissected in normal ice cold aCSF containing (in mM) 113 NaCl, 3 KCl, 25 NaHCO<sub>3</sub>,  
8 1 NaH<sub>2</sub>PO<sub>4</sub>, 2 CaCl<sub>2</sub>, 2 MgCl<sub>2</sub>, and 11 D-glucose (same solution was used for recording).  
9 The spinal cord was then glued onto an agar block and affixed to the chamber of a vibrating  
10 slicer (HM 650V, Microm). We used a slicing solution containing (in mM) 130 K-gluconate, 15  
11 KCl, 0.05 EGTA, 20 HEPES, 25 D-glucose, 3 kynurenic acid and pH 7.4 with NaOH (Dugue  
12 et al., 2005). For cutting oblique slices, the cord was glued to an agar block cut at a 45  
13 degrees angle, with the ventral side facing the direction of the blade (Lamotte d'Incamps et  
14 al., 2017).

15 For coronally sliced preparations in which the dorsal horns were ablated, the cord was glued  
16 horizontally with the ventral surface facing upwards. A blade was used to transect the cord at  
17 the L1-L2 boundary at an angle that allowed visualization of the exact position of the central  
18 canal under a dissection microscope. The vibratome blade was then aligned to the central  
19 canal and the ventral portion of the cord was sliced away from the dorsal part. Alignment  
20 with the central canal was essential to ensure a consistent dorsoventral level of the ablation  
21 across different preparations and to retain the dorsal motor nuclei near the cut surface of the  
22 tissue.

23 Identical procedures were used for juvenile (P7-14) and mature (P15-25) animals. For older  
24 animals we routinely cut the first slice within 8 minutes following decapitation. Since spinal  
25 cord preparations are extremely sensitive to anoxia especially prior to slicing, we found that  
26 minimizing the time to obtain the first slice consistently resulted in viable preparations with  
27 healthy motoneurons (Lamotte d'Incamps et al., 2017).

## 1 **Electrophysiology**

2 All recordings from post-synaptic motoneurons were performed with a Molecular Devices  
3 Axopatch 200B amplifier, filtered at 5 kHz and digitized at 50 kHz. Patch pipettes were pulled  
4 to resistances in the range of 0.8–2 M $\Omega$  when filled with (in mM) 125 K-gluconate, 6 KCl, 10  
5 HEPES, 0.1 EGTA, 2 Mg-ATP, pH 7.3 with KOH, and osmolarity of 290–310 mOsm. During  
6 voltage-clamp recordings, Mns were clamped at –60 mV with series resistances in the range  
7 of 2–10 M $\Omega$  compensated by 60-80%.

8 For paired recordings, loose cell attached stimulation was used to evoke spikes in putative pre-  
9 synaptic motoneurons using an ELC-03X (NPI Instruments) amplifier and a 4–5 M $\Omega$  pipette  
10 filled with normal aCSF (Bhumbra et al., 2014). Ventral root stimulation was delivered to evoke  
11 recurrent excitatory post-synaptic currents in motoneurons using a glass suction electrode  
12 whose tip was cut to correspond with the size of the ventral root (Moore et al., 2015). The stim-  
13 ulation intensity was increased until the size of the rEPSC remained constant, typically at 5 $\times$   
14 threshold. For measuring the size of the excitatory response in some Mns, where it was neces-  
15 sary to prevent action potentials, cells were hyperpolarised below their resting membrane po-  
16 tential; measurements of synaptic current and potentials were adjusted to their predicted value  
17 at –60 mV assuming a reversal potential of 0 mV for excitatory conductances. All electrophysi-  
18 ological experiments were performed in the presence of 0.5  $\mu$ M strychnine and 3  $\mu$ M gabazine.  
19 Where indicated, excitatory receptors were blocked using D-2-amino-5-phosphonopentanoic  
20 acid (APV), 1,2,3,4-tetrahydrobenzo(f)quinoxaline-7-sulphonamide (NBQX), methyllycaconi-  
21 tine (MLA) or dihydro- $\beta$ -erythroidine (DH $\beta$ E).

## 22 **Intramuscular injections**

23 In order to label motoneurons innervating the ankle flexor gastrocnemius muscle, intramus-  
24 cular injections were performed 2-5 days prior to recording. Inhalant isoflurane was used  
25 for the induction and maintenance of anaesthesia. Traction was applied to the lower limb and  
26 an incision was made through the skin and deep fascia overlying the muscle. A Hamilton  
27 syringe loaded with a glass needle was used to inject 1  $\mu$ l of CTB-Alexa-Fluor-555 (0.2% in

1 1× phosphate buffer saline) into the middle of the muscle belly over a period of at least 1  
2 minute. The skin was closed by suture using a buried stitch before cessation of anaesthesia  
3 and recovery.

#### 4 **Calcium imaging**

5 Calcium imaging experiments were performed on animals selectively expressing the geneti-  
6 cally encoded calcium indicator GCaMP6s in motoneurons. These mice were generated by  
7 crossing mice expressing Cre under the control of choline-acetyltransferase (ChAT-Cre, JAX  
8 mouse line number 006410) with animals with the gene expressing GCaMP6 flanked by a  
9 flox-Stop cassette (JAX mouse line number 028866). Upon recombination with Cre, GCaMP6  
10 is selectively expressed in motoneurons and other cholinergic cells of the offspring. Since  
11 the only other population of ChAT positive lumbar spinal cells are the cholinergic partition  
12 neurones located around the central canal, there was no ambiguity in the identification of mo-  
13 toneurons from their basal GCaMP6 fluorescence and position within the motor nuclei.

14 Dorsal horn ablated coronal slice preparations (P9-12) were used for imaging experiments  
15 to visualise the dorsal motor nuclei in the L4 and L5 segments containing Mns innervating  
16 tibialis anterior, gastrocnemius, and peroneus longus close the cut surface. A laser scanning  
17 confocal unit (D-Eclipse C1, Nikon) with a diode laser ( $\lambda = 488$  nm, power output from optic  
18 fibre 3–5 mW) was used to locate and record calcium signals from Mns reaching a depth of  
19 approximately 100  $\mu\text{m}$  from the surface. Fields of 128x64 pixels (pixel size 1.38  $\mu\text{m}$  and dwell  
20 7.2  $\mu\text{s}$ ) were scanned with a frame interval of 146 ms over different regions throughout the  
21 dorsal motor column. Trains of 3 stimuli at 30 Hz were delivered to the ventral root (L4 or  
22 L5) while images were being acquired from at least 1 s before the onset of the first stimulus  
23 pulse. For each field, calcium signals were acquired for a total of 35 frames corresponding to  
24 approximately 5 s, and the position of each field was recorded.

25 Post-hoc analysis was performed to quantify Mn responses. Within each field, single Mns  
26 were identified by their fluorescence and regions of interests were defined by the contour  
27 profiles of their somata. The time course of excitation was measured using the change in

1 mean fluorescence following stimulation divided by the baseline average. In some cases, slow  
2 drifts in fluorescence was corrected by fitting an exponential to the initial trace before the  
3 stimulus. Changes in fluorescence exceeding two standard deviations of the baseline noise  
4 were measured over a 1 s window following ventral root stimulation.

## References

- Alvarez FJ, Villalba RM, Zerda R, Schneider SP (2004) Vesicular glutamate transporters in the spinal cord, with special reference to sensory primary afferent synapses. *J Comp Neurol* **472**(3):257–80.
- Bhumbra GS, Bannatyne BA, Watanabe M, Todd AJ, Maxwell DJ, Beato M (2014) The recurrent case for the renshaw cell. *J Neurosci* **34**(38):12919–32.
- Bonnot A, Chub N, Pujala A, O'Donovan M (2009) Excitatory actions of ventral root stimulation during network activity generated by the disinhibited neonatal mouse spinal cord. *J Neurophysiol.* **101**(6):2995–3011.
- Borodinsky LN, Spitzer NC (2007) Activity-dependent neurotransmitter-receptor matching at the neuromuscular junction. *Proc Natl Acad Sci U S A* **104**(1):335–40.
- Coggeshall RE (1980) Law of separation of function of the spinal roots. *Physiol Rev* **60**(3):716–55.
- Cullheim S, Kellerth J, Conradi S (1977) Evidence for direct synaptic interconnections between cat spinal alpha-motoneurons via the recurrent axon collaterals: a morphological study using intracellular injection of horseradish peroxidase. *Brain Res.* **132**(1):1–10.
- Dugue G, Dumoulin A, Triller A, Dieudonne S (2005) Target-dependent use of co-released inhibitory transmitters at central synapses. *J Neurosci* **25**(28):6490–6498.
- Gogan P, Gueritaud J, Horcholle-Bossavit G, Tyc-Dumont S (1977) Direct excitatory interactions between spinal motoneurons of the cat. *J Physiol* **272**(3):755–767.

- Herzog E, Landry M, Buhler E, Bouali-Benazzouz R, Legay C, Henderson CE, Nagy F, Dreyfus P, Giros B, El Mestikawy S (2004) Expression of vesicular glutamate transporters, vglut1 and vglut2, in cholinergic spinal motoneurons. *Eur J Neurosci* **20**(7):1752–60.
- Ichinose T, Miyata Y (1998) Recurrent excitation of motoneurons in the isolated spinal cord of newborn rats detected by whole-cell recording. *Neurosci Res.* **31**(3):179–187.
- Jiang ZG, Shen E, Wang MY, Dun NJ (1991) Excitatory postsynaptic potentials evoked by ventral root stimulation in neonate rat motoneurons in vitro. *J Neurophysiol* **65**(1):57–66.
- Kiehn O (2016) Decoding the organization of spinal circuits that control locomotion. *Nat Rev Neurosci* **17**(4):224–38.
- Lamotte d'Incamps B, Ascher P (2008) Four excitatory postsynaptic ionotropic receptors coactivated at the motoneuron-renshaw cell synapse. *J Neurosci* **28**(52):14121–31.
- Lamotte d'Incamps B, Bhumbra GS, Foster JD, Beato M, Ascher P (2017) Segregation of glutamatergic and cholinergic transmission at the mixed motoneuron renshaw cell synapse. *Sci Rep* **7**(1):4037.
- Lamotte d'Incamps B, Krejci E, Ascher P (2012) Mechanisms shaping the slow nicotinic synaptic current at the motoneuron-renshaw cell synapse. *J Neurosci* **32**(24):8413–23.
- Leroy F, Lamotte d'Incamps B, Imhoff-Manuel RD, Zytnicki D (2014) Early intrinsic hyperexcitability does not contribute to motoneuron degeneration in amyotrophic lateral sclerosis. *Elife* **3**.
- Liu TT, Bannatyne BA, Jankowska E, Maxwell DJ (2009) Cholinergic terminals in the ventral horn of adult rat and cat: evidence that glutamate is a cotransmitter at putative interneuron synapses but not at central synapses of motoneurons. *Neuroscience* **161**(1):111–22.
- Machacek DW, Hochman S (2006) Noradrenaline unmask novel self-reinforcing motor circuits within the mammalian spinal cord. *J Neurosci* **26**(22):5920–8.
- McCrea D, Rybak I (2008) Organization of mammalian locomotor rhythm and pattern generation. *Brain Res.Rev.* **57**(1):134–146.

Mentis G, Alvarez F, Bonnot A, Richards D, Gonzalez-Forero D, Zerda R, O'Donovan M (2005) Noncholinergic excitatory actions of motoneurons in the neonatal mammalian spinal cord. *PNAS* **102**(20):7344–7349.

Moore NJ, Bhumbra GS, Foster JD, Beato M (2015) Synaptic connectivity between renshaw cells and motoneurons in the recurrent inhibitory circuit of the spinal cord. *J Neurosci* **35**(40):13673–86.

Nishimaru H, Restrepo C, Ryge J, Yanagawa Y, Kiehn O (2005) Mammalian motor neurons corelease glutamate and acetylcholine at central synapses. *PNAS* **102**(14):5245–5249.

Perrins R, Roberts A (1995) Cholinergic and electrical synapses between synergistic spinal motoneurons in the xenopus laevis embryo. *J Physiol* **485** ( Pt 1):135–44.

Richards DS, Griffith RW, Romer SH, Alvarez FJ (2014) Motor axon synapses on renshaw cells contain higher levels of aspartate than glutamate. *PLoS One* **9**(5):e97240.

Todd AJ, Hughes DI, Polgar E, Nagy GG, Mackie M, Ottersen OP, Maxwell DJ (2003) The expression of vesicular glutamate transporters vglut1 and vglut2 in neurochemically defined axonal populations in the rat spinal cord with emphasis on the dorsal horn. *Eur J Neurosci* **17**(1):13–27.

Zeilhofer H, Studler B, Arabadzisz D, Schweizer C, Ahmadi S, Layh B, Bosl M, Fritschy J (2005) Glycinergic neurons expressing enhanced green fluorescent protein in bacterial artificial chromosome transgenic mice. *J Comp Neurol*. **482**(2):123–141.

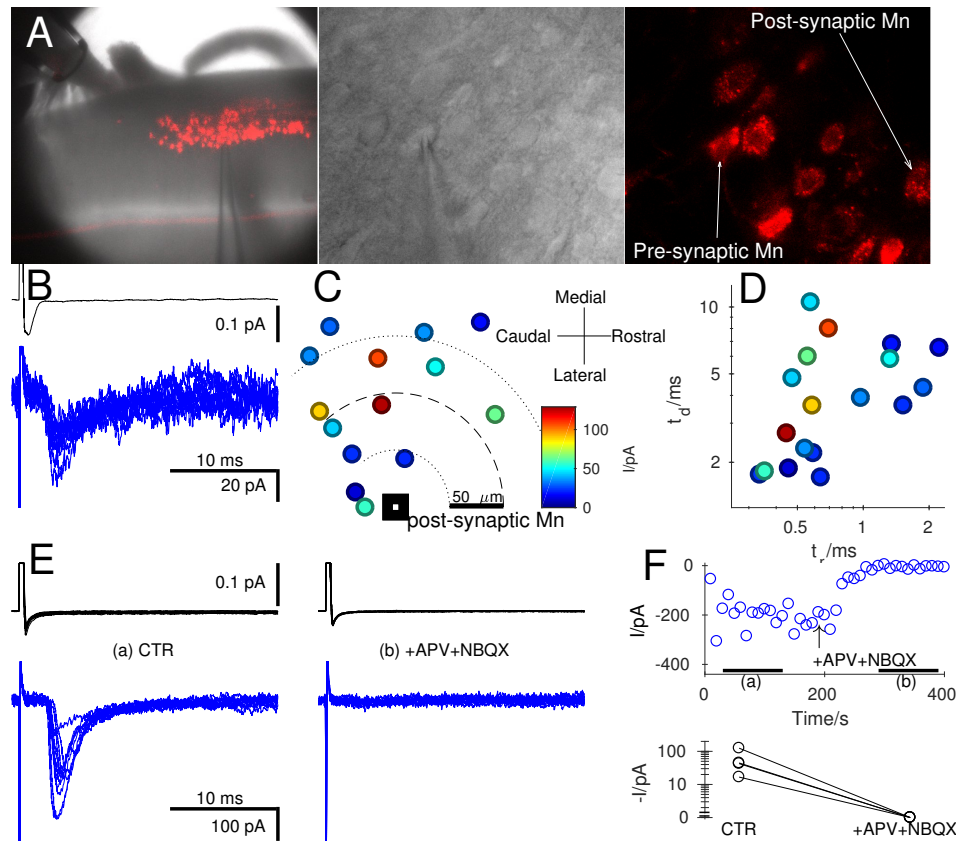

Figure 1: Paired recordings from motoneurons showed small unitary currents that were purely glutamatergic. Prior intramuscular injection of gastrocnemius with CTB-Alexa-Fluor-555 fluorescently labelled the dorsal motor column (A) within the coronal preparation (left) for simultaneous visualisation of motoneurons using intrared (middle) and confocal (right) optics. Pre-synaptic cells were stimulated in loose cell-attached voltage-clamp (B, upper trace) while recording evoked post-synaptic responses in whole-cell voltage clamp (B, lower trace). Connected motoneurons were usually within  $150\ \mu\text{m}$  of one other and in most paired recordings (14/18) their respective locations were recorded. Graph C plots the relative position of each pre-synaptic Mn in relation to the post-synaptic cell, with colour-coded size of the corresponding responses. A similar colour-code and scale is used in graph D, showing decay time ( $t_d$ ) against the rise time ( $t_r$ ). Using oblique slice preparations (see text), we investigated the pharmacology of the synapse. Panel E shows a representative recording in control (CTR, left) and following glutamatergic blockade (E, right) using APV and NBQX. The time course of changes in evoked responses during the bath application of the antagonists showed complete suppression of currents (F, top). Similar effects were observed for all four paired recordings (F, bottom).



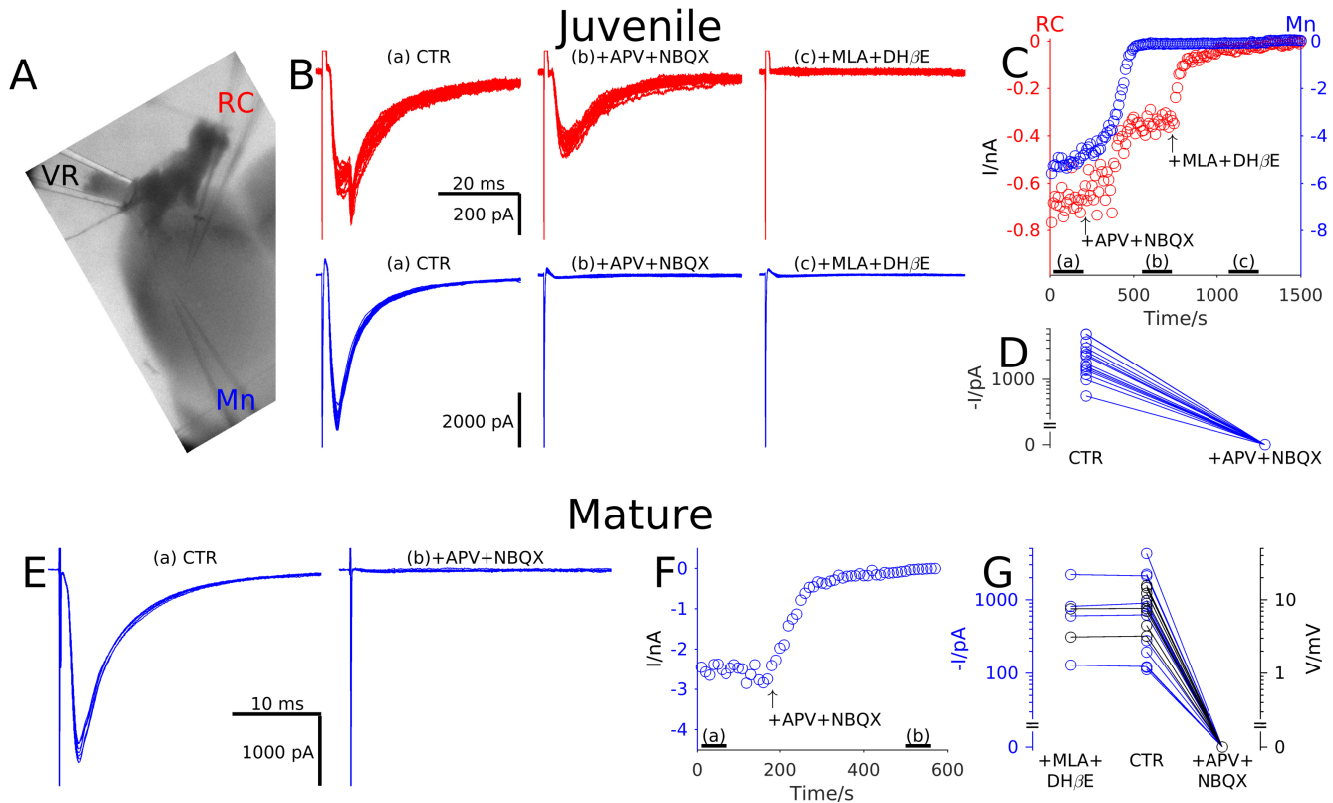

Figure 2: Electrophysiological recordings from both juvenile and mature preparations showed that recurrent excitation in motoneurons is purely glutamatergic. In oblique slice preparations (A) a suction electrode was used to stimulate the ventral root (VR) while recording responses from a motoneuron (Mn) and, in the illustrated example, also from a Renshaw cell (RC); note that the RC response shown includes a second component originating from a gap junction (Lamotte d'Incamps et al., 2012). Panel B illustrates post-synaptic responses (stimulus artefacts truncated) of the RC (red, top) and Mn (blue, bottom) in control (left), in the presence of glutamatergic antagonists (middle) and following block of cholinergic transmission with MLA and DH $\beta$ E (right). The time course of changes in currents (C, top) during application of the antagonists showed partial attenuation of RC responses and full suppression of Mn responses in the presence of glutamatergic antagonists. RC currents were only abolished by block of cholinergic receptors. In all Mns tested the rEPSC was completely abolished by glutamatergic antagonists (D). Similar experiments were performed on mature preparations in which Mn responses to VR stimulation were recorded in control (E, left) and during glutamatergic blockade (E, right). Once again the time course of changes in responses (F) showed complete suppression of Mn responses in the presence of glutamatergic antagonists. Graph G summarises the group data from Mns recorded in voltage clamp (black) and current clamp (blue) showing no effect following bath application of cholinergic antagonists whereas glutamatergic blockade completely abolishes responses.



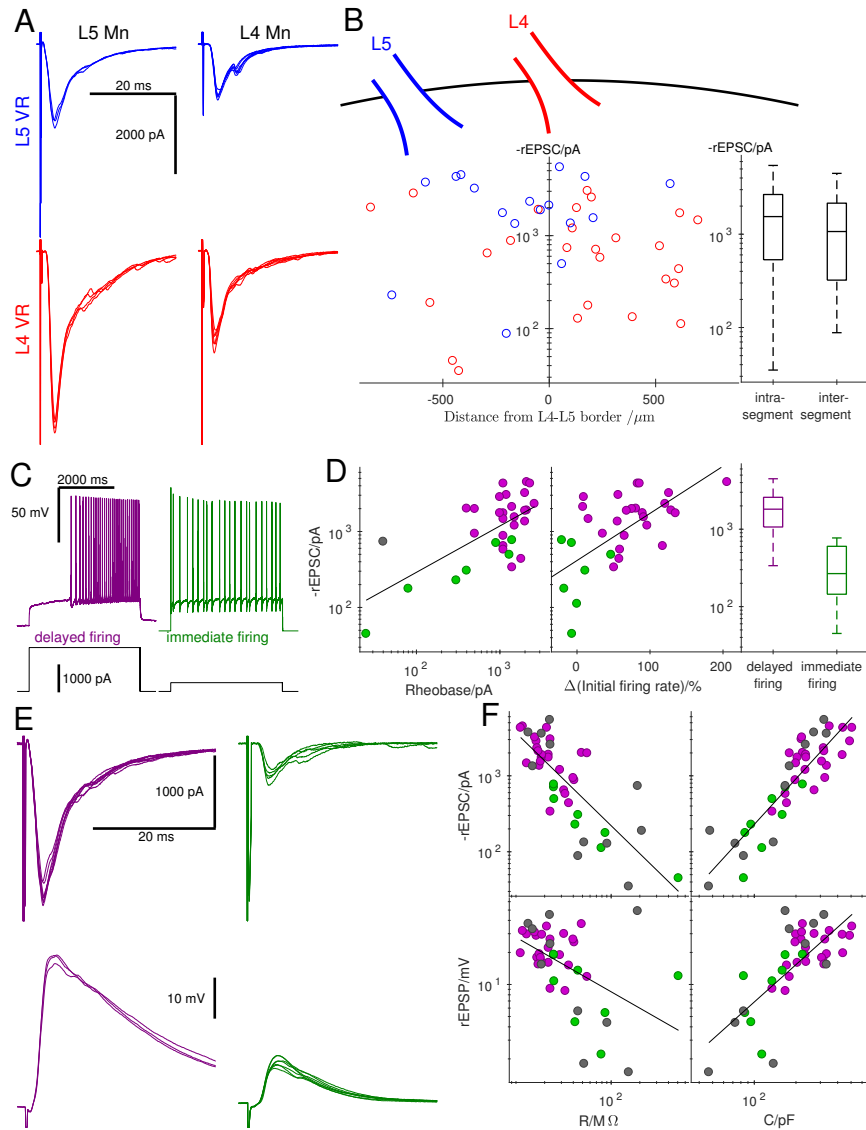

Figure 3: Recordings from coronal preparations showed that the magnitude of rEPSCs was related not to the position of the Mn but to its firing type. Example traces of evoked responses (stimulus artefacts truncated) of motoneurons located in L5 (A, left) and L4 (A, right) segments are illustrated following stimulation of the L5 (A, top, blue) and L4 (A, bottom, red) ventral root; the response in the top right trace exhibited a late component, suggesting activation of a disynaptic pathway. Panel B shows the size of rEPSCs recorded from all Mns against their distance from L4-L5 border (rostral positive) colour-coded according to whether L5 (blue) or L4 (red) VR was stimulated. There was no systematic association between rEPSCs and position as shown in the box-and-whiskers plot (B, right) comparing intra-segmental to inter-segmental responses. Two Mn cell types were distinguished using current-clamp recordings on the basis of whether at rheobase, positive current application elicited delayed (C, left, purple) or immediate (C, right, green) firing. Delayed firing cells (purple) were associated with a high rheobase (D, left), an accelerating initial firing rate (D, middle), and large evoked rEPSCs (D, right) in comparison to immediate firing cells (green). The traces in E illustrate representative responses to VR stimulation from a delayed firing cell (purple, left) and immediate firing cell (green, right) recorded in voltage-clamp (top) and current-clamp (bottom). Graph F shows the group data, plotting the rEPSCs and rEPSPs against cell resistance and capacitance, using grey circles to denote cells that were not identified by their firing pattern at rheobase. In all four cases, correlations were observed demonstrating that responses were greater in larger Mns, which tended to be of the delayed firing type.

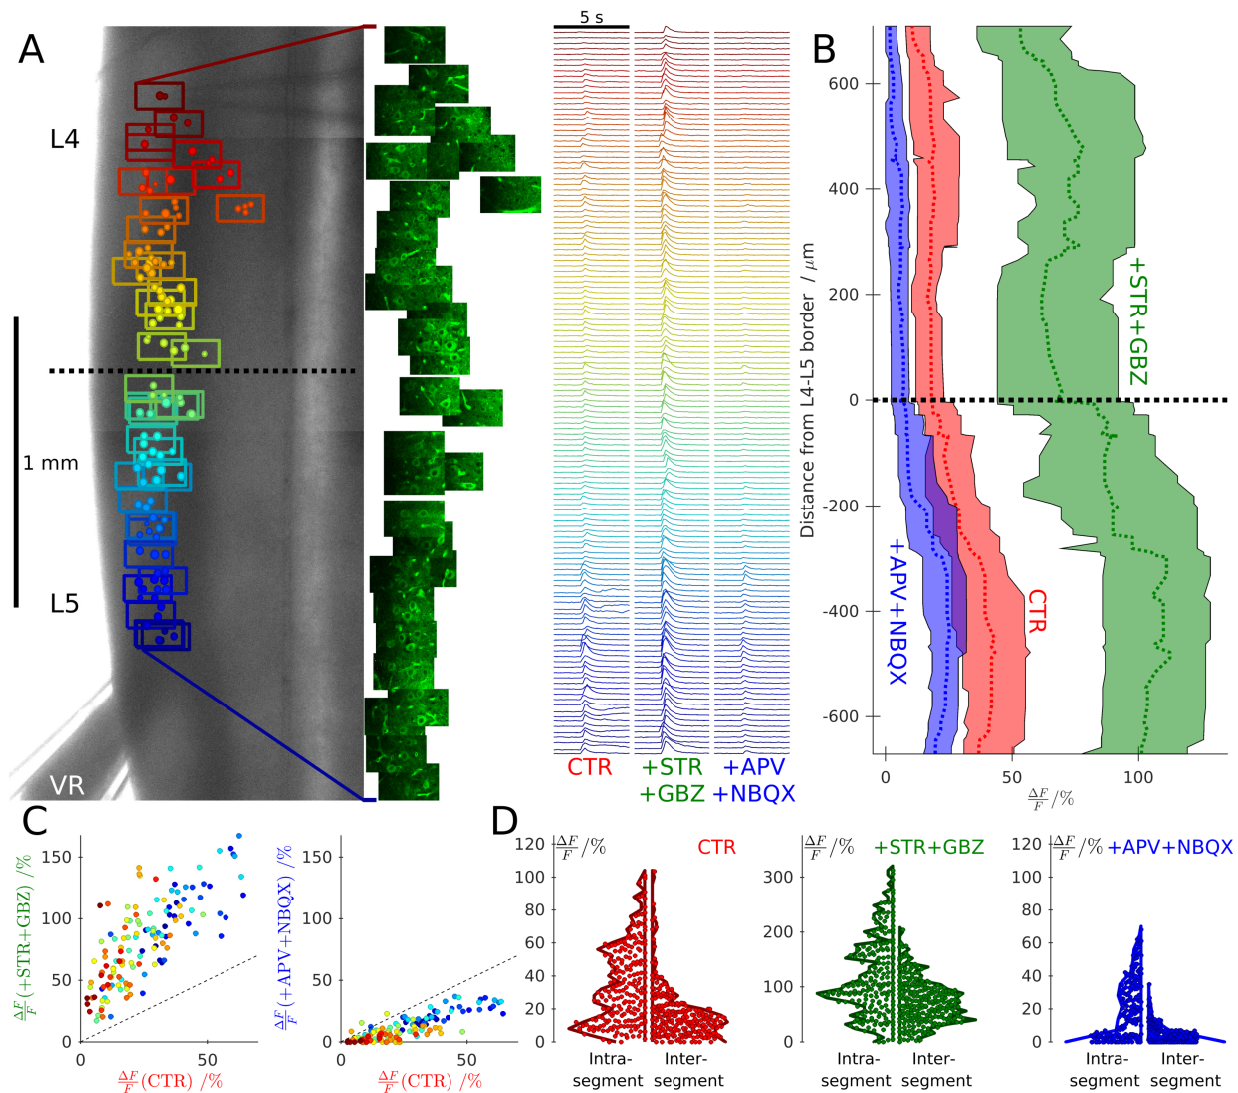

Figure 4: Calcium imaging from coronal preparations showed that recurrent excitation from one segment can evoke spikes in adjacent segments with intact recurrent inhibition, but these responses are abolished by glutamatergic antagonists. An example of such a recording is illustrated in A, which overlays the Mn positions within optical fields colour-coded by position, on top of a low-magnification image (A, left) of a coronal L4-5 preparation from a ChAT-GCaMP6s mouse in which Mns express GCaMP6s. A suction pipette was used to stimulate the L5 ventral root (VR) while acquiring fluorescence intensities throughout each field (A, middle). Changes in Mn fluorescence were measured and plotted against time (A, right) under control conditions (CTR) in the presence of pharmacological blockade of inhibition (+STR+GBZ) and addition of further antagonists to block glutamatergic neurotransmission (+APV+NBQX). The results for this experiment are summarised in graph B, in which running medians and inter-quartile ranges of responses are plotted for the three conditions against the distance from the L4-5 border (rostral positive). Recurrent excitation from L5 evoked firing in Mns throughout the L4 segment and these responses were enhanced by inhibitory antagonists and abolished by glutamatergic blockade. These effects are illustrated by the graphs in C which plots the signal response under control conditions with that in the presence of antagonists of inhibition (C, left) and glutamatergic blockade (C, right), preserving the colour-coding of position in the rostral-caudal axis used in panel A. Violin plots summarise the group data, comparing intra-segmental and inter-segmental responses, showing the distribution of the magnitude of responses from all Mns under control conditions (D, left), inhibitory blockade (E, middle; on a different  $y$ -scale), and in the additional presence of glutamatergic antagonists (D, right).
